# Supplementary material
Source: PubMed Central journal article supplement (PMC4185415)
Supplement: NIHMS623234-supplement-1.pdf [file NIHMS623234-supplement-1.pdf]

**Supplementary Table S1. RT-qPCR Primers**

| Human Genes |                   |                               |                                |
|-------------|-------------------|-------------------------------|--------------------------------|
| Gene*       | Product Size (bp) | Forward Sequence              | Reverse Sequence               |
| AITRL       | 158               | 5'-AGCCATTCAAGAACTCAAGGAG-3'  | 5'-GGTCCAAACTTAGCCATACAGG-3'   |
| ANG2        | 73                | 5'-TCTTGGCCGACGCTATAAC-3'     | 5'-TGCTGGACCTGATATTGCTTCT-3'   |
| APRIL       | 168               | 5'-CTCTGCTGACCCAA CA AACAG-3' | 5'-TTTTCCGGATCTCTCCCAAT-3'     |
| BAFF        | 79                | 5'-GGGAGCATCA CGCCTTAC-3'     | 5'-CGTGGGAGGATGGAAACACAC-3'    |
| CCL2        | 152               | 5'-GATCTCAGTGCA GAGGCTCG-3'   | 5'-TGCTTGTCAGGTGGTCCAT-3'      |
| CCL20       | 224               | 5'-TGCTGTACCAAGAGTTTGCTC-3'   | 5'-CGCACACAGACA ACTTTTTCTTT-3' |
| CSF1        | 228               | 5'-GCTCTCCCAGGATCTCATCAC-3'   | 5'-TCAAAGGAACGGAGTTAAAACGG-3'  |
| CXCL1       | 97                | 5'-GAAAGCTTGCCCTCAA TCCTG-3'  | 5'-CTTCCTCCTCCCTTCTGGTC-3'     |
| CXCL2       | 103               | 5'-GGGCAGAAAGCTTGCTCAA-3'     | 5'-GCTTCCTCCTTCTTCTGGT-3'      |
| IL1B        | 100               | 5'-CAGCTACGAA TCTCCGACAC-3'   | 5'-GGCAGGAAACGACATCTTC-3'      |
| IL4         | 150               | 5'-CCAACTGCTTCCCCCTCTG-3'     | 5'-TCTGTTACGGTCAACTCGGTG-3'    |
| IL6         | 159               | 5'-AACCTGAACCTTCCAAGATGG-3'   | 5'-TCTGGCTTGTCTCTCACTACT-3'    |
| IL8         | 194               | 5'-TTTTGCCAAGGAGTGCTAAA GA-3' | 5'-AACCTCTGCACCCAGTTTTCT-3'    |
| IL10        | 176               | 5'-TCAAAGCGCATGTGAACTCC-3'    | 5'-GATGTCAA ACTCACTCATGGCT-3'  |
| IL13        | 122               | 5'-GAAGGCTCCGCTCTGCAAT-3'     | 5'-TCTGGGTCTTCTCGATGGCA-3'     |
| TGF-β       | 251               | 5'-ACGGCGTTACAGTGTTCTG-3'     | 5'-ACAGTAGTTGGAAGTCTAT-3'      |
| TNF-α       | 217               | 5'-ATGACACTGAAA GCATGATCC-3'  | 5'-GAGGGCTGATTAGAGAGGGTC-3'    |
| VEGFA       | 117               | 5'-ATCACGAAGTGGTGAAGTTC-3'    | 5'-TGCTGTAGGAAGCTCATCTC-3'     |
| β-actin     | 131               | 5'-TCCTCTCCCAAGTCCACA CAGG-3' | 5'-GGGCAGAAAGGCTCATCATTC-3'    |

| Mouse Genes |                   |                               |                               |
|-------------|-------------------|-------------------------------|-------------------------------|
| Gene*       | Product Size (bp) | Forward Sequence              | Reverse Sequence              |
| AITRL       | 131               | 5'-ATGTCTTTCTAACCTTGATC-3'    | 5'-AGAGTTTGGAGGATTAAGG-3'     |
| Ang 2       | 68                | 5'-TGGTACTACTGGAA GGGGTCCG-3' | 5'-GAAATCTGCTGGCCGGATCA-3'    |
| APRIL       | 109               | 5'-AGTCCTGCATCTTGTTCCAG-3'    | 5'-TGTCTTCCCAGATACACAC-3'     |
| BAFF        | 129               | 5'-TGGGTCA TGTCATCCAGAGG-3'   | 5'-CATCTCCTTCTTCCAGCCTC-3'    |
| CCL2        | 91                | 5'-CCA CTCACTGCTGCTA CTC-3'   | 5'-GGTTCGGATCCAGGTTTTTA-3'    |
| CCL20       | 179               | 5'-AGGCAGAA GCAAGCAACTAC-3'   | 5'-TTTTACCCAGTTCTGCTTT-3'     |
| CSF1        | 149               | 5'-ACAGAGGACCAAAA GCCAGT-3'   | 5'-ACGGGGTGGCTGAGTTGCT-3'     |
| CXCL1       | 168               | 5'-GCTGGGATTACCTCAAGAA-3'     | 5'-TGGGGACACCTTTTAGCATC-3'    |
| CXCL2       | 175               | 5'-AGGCTACA GGGGCTGTTGT-3'    | 5'-TTCA GGGTCAAGGCAAACTT-3'   |
| IL1B        | 89                | 5'-CAGCTACGAA TCTCCGACAC-3'   | 5'-GGCAGGAA CCA GCATCTTC-3'   |
| IL4         | 169               | 5'-AGTTGTCA TCCTGCTTCT-3'     | 5'-CTGTGGTGTCTTCTGTTGCT-3'    |
| IL6         | 76                | 5'-TAGTCCTTCC TACCCCAATTCC-3' | 5'-TTGGTCTTAGCCACTCCTTC-3'    |
| IL10        | 149               | 5'-TGCA GTGTGTA TTGAGTCTG-3'  | 5'-GCTCAGTGAATAAA TAGAAT-3'   |
| IL13        | 179               | 5'-GTCTCTCCCTCTGACCCCTA-3'    | 5'-CTCTGGGTCTGTAGATGGC-3'     |
| TGF-β       | 133               | 5'-CTCCCGTGGCTTCTAGTGC-3'     | 5'-GCCTTAGTTGGACAGGATCTG-3'   |
| TNF-α       | 61                | 5'-CCCTCACACTCAGATCATCTTCT-3' | 5'-GCTACGACGTGGGCTACAG-3'     |
| VEGFA       | 105               | GCACATAGAGAGAATGAGCTTCC       | 5'-CTCCGCTGTAAACAAGGCT-3'     |
| β-actin     | 153               | 5'-GGCTGTATTCCCCTCCATCG-3'    | 5'-CCAGTTGGTAA CAATGCCATGT-3' |

\*Primers were designed based on human or mouse CDS of targets found in NCBI database. All primers were validated using human and mouse universal cDNA. Primers were confirmed to exclusively detect species-specific cDNA.

**Supplementary Table S2.** Effect of TLR4 on incidence and metastatic burden in nab-PXL treated and untreated mice

| Organ                   | TLR4 Status          | Treatment <sup>a</sup> | Incidence | Burden <sup>b</sup> | Fold Change <sup>c</sup> | P-Value         |                       |
|-------------------------|----------------------|------------------------|-----------|---------------------|--------------------------|-----------------|-----------------------|
|                         |                      |                        |           |                     |                          | TLR4- vs. TLR4+ | Untreated vs. Treated |
| <b>MDA-MB-231 Model</b> |                      |                        |           |                     |                          |                 |                       |
| Lymph Nodes             | TLR4+                | ---                    | 100       | 344.7 ± 92.6        | --                       | ---             | ---                   |
| Lungs                   | TLR4+                | nab-PXL                | 100       | 139.1 ± 96.3        | 2.5↓                     | ---             | NS <sup>d</sup>       |
|                         | TLR4+                | ---                    | 100       | 23.5 ± 11.3         | --                       | ---             | ---                   |
| Lungs                   | TLR4+                | nab-PXL                | 100       | 11.3 ± 3.8          | 2.1↓                     | ---             | NS                    |
|                         | TLR4-                | ---                    | 100       | 222.8 ± 100.6       | --                       | NS              | ---                   |
| Lungs                   | TLR4-                | nab-PXL                | 20        | 50.0 <sup>e</sup>   | 4.4↓                     | NS              | ---                   |
|                         | TLR4-                | ---                    | 80        | 2.7 ± 0.9           | --                       | 0.03            | ---                   |
| Lungs                   | TLR4-                | nab-PXL                | 20        | 0.6                 | 4.5↓                     | 0.003           | 0.04                  |
|                         | <b>HCC1806 Model</b> |                        |           |                     |                          |                 |                       |
| Lymph Nodes             | TLR4-                | ---                    | 50        | 19.5 ± 11.4         | --                       | ---             | ---                   |
|                         | TLR4-                | nab-PXL                | 20        | 2.1 ± 1.7           | 9.3↓                     | ---             | NS                    |
| Lungs                   | TLR4-                | ---                    | 10        | 0.2                 | --                       | ---             | ---                   |
|                         | TLR4-                | nab-PXL                | 30        | 1.1 ± 1.0           | <b>5.5↑</b>              | ---             | NS                    |
| Lymph Nodes             | TLR4+                | ---                    | 50        | 5.4 ± 2.4           | --                       | NS              | ---                   |
|                         | TLR4+                | nab-PXL                | 90        | 1325.5 ± 649.3      | <b>245.3↑</b>            | 0.008           | 0.002                 |
| Lungs                   | TLR4+                | ---                    | 40        | 0.1 ± 0.08          | --                       | NS              | ---                   |
|                         | TLR4+                | nab-PXL                | 90        | 1.2 ± 0.3           | <b>12.0↑</b>             | 0.01            | 0.004                 |

<sup>a</sup>Mice were treated with nab-PXL at the dose of 10 mg/kg for 10 days

<sup>b</sup>Expressed as RLU/mg of total protein × 10<sup>4</sup> ± SEM

<sup>c</sup>Fold decrease (↓) or increase (↑) as compared with untreated controls; increases are bolded

<sup>d</sup>NS, non-significant

<sup>e</sup>The values without SEM indicate a single positive animal per group
